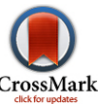

# MGMT Promoter Methylation Correlates with an Overall Survival Benefit in Chinese High-Grade Glioblastoma Patients Treated with Radiotherapy and Alkylating Agent-Based Chemotherapy: A Single-Institution Study

Dong Shen, Tao Liu, Qingfen Lin, Xiangdong Lu, Qiong Wang, Feng Lin, Weidong Mao\*

Department of Oncology, the Affiliated Jiangyin Hospital of Southeast University Medical College, Jiangyin, P.R. China

## Abstract

Promoter methylation of the O<sup>6</sup>-methylguanine-DNA-methyltransferase (MGMT) gene has been considered a prognostic marker and has become more important in the treatment of glioblastoma. However, reports on the correlation between MGMT and clinical outcomes in Chinese glioblastoma patients are very scarce. In this study, quantitative methylation data were obtained by the pyrosequencing of tumor tissues from 128 GBM patients. The median overall survival (OS) was 13.1 months, with a 1-year survival of 45.3%. The pyrosequencing data were reproducible based on archived samples yielding data for all glioblastomas. MGMT promoter methylation was detected in 75/128 cases (58.6%), whereas 53/128 (41.4%) cases were unmethylated. Further survival analysis also revealed that methylation was an independent prognostic factor associated with prolonged OS but not with progression-free survival (PFS) ( $p=0.029$  and  $p=0.112$ , respectively); the hazard ratios were 0.63 (95% CI: 0.42–0.96) and 0.72 (95% CI: 0.48–1.09), respectively. These data indicated that MGMT methylation has prognostic significance in patients with newly diagnosed high-grade glioblastoma undergoing alkylating agent-based chemotherapy after surgical resection.

**Citation:** Shen D, Liu T, Lin Q, Lu X, Wang Q, et al. (2014) MGMT Promoter Methylation Correlates with an Overall Survival Benefit in Chinese High-Grade Glioblastoma Patients Treated with Radiotherapy and Alkylating Agent-Based Chemotherapy: A Single-Institution Study. *PLoS ONE* 9(9): e107558. doi:10.1371/journal.pone.0107558

**Editor:** Domenico Coppola, H. Lee Moffitt Cancer Center & Research Institute, United States of America

**Received:** May 20, 2014; **Accepted:** August 11, 2014; **Published:** September 11, 2014

**Copyright:** © 2014 Shen et al. This is an open-access article distributed under the terms of the Creative Commons Attribution License, which permits unrestricted use, distribution, and reproduction in any medium, provided the original author and source are credited.

**Data Availability:** The authors confirm that all data underlying the findings are fully available without restriction. All relevant data are within the paper and its Supporting Information files.

**Funding:** The authors have no support or funding to report.

**Competing Interests:** The authors have declared that no competing interests exist.

\* Email: wdmao\_jy@163.com

## Introduction

Glioblastoma is considered the highest-mortality cancer of the central nervous system. Although multimodal treatment by surgery, radiotherapy, and chemotherapy is applied, its prognosis is extremely poor [1]. Several reports have shown that epigenetic silencing of MGMT via promoter methylation is associated with improved survival in GBM patients treated with alkylating agents such as temozolomide (TMZ) [2–5]. The cytotoxic effects of temozolomide (TMZ) are mediated by DNA methylation at the O<sup>6</sup> position of guanine as well as by an intact DNA mismatch repair pathway. As the DNA repair protein O<sup>6</sup>-methylguanine-DNA-methyltransferase (MGMT) repairs O<sup>6</sup>-methyl adducts in DNA, MGMT is a critical regulator of the cytotoxic effects of TMZ [5,6]. Hypermethylation of the MGMT promoter region can silence its expression and result in a deficiency in MGMT-mediated DNA repair and is most frequently detected in high-grade glioma (HGG) and colorectal carcinomas. Hypermethylation of the MGMT promoter in gliomas is associated with sensitivity to alkylating agents including nitrosoureas and TMZ. Reports about the clinical significance of the MGMT promoter methylation status in cohorts of Chinese GBM patients are however very scarce [7]. The objective of this study was to

investigate the MGMT promoter methylation status for evaluating the prognostic significance of MGMT in a patient cohort with GBM in a single Chinese institution.

## Patients and methods

### Patients

The study included 128 newly diagnosed, previously untreated, high-grade (grade IV) glioblastoma Han Chinese patients treated from 2008 to 2012 in Department of Oncology, the Affiliated Jiangyin Hospital of Southeast University Medical College. There were 79 males and 49 females. The median age was 56 years (range, 35–71 years). The tumor sizes ranged from 3.7×3.5×2.0 cm to 7.2×6.7×5.8 cm. All the patients had undergone prior surgical resection, followed by radiotherapy plus alkylating agent-based chemotherapy. Clinical data were collected retrospectively, and treatment response was monitored with magnetic resonance imaging (MRI) scans after surgery at regular 3-month intervals during follow-up. The progression-free survival (PFS) and overall survival (OS) were calculated from the date of diagnosis.

Approval for the study was obtained from the Medical Ethics Committee of the Affiliated Jiangyin Hospital of Southeast

University Medical College. Written informed consent was signed by the patients.

### Pathology and tissues

Tumor samples were collected from the 128 patients. For the tumor tissues, a consultant neuropathologist reconfirmed the diagnosis of glioblastoma WHO grade IV and selected suitable samples for analysis by visual microscopic assessment, with >70% neoplastic cells and <50% necrosis from intraoperative cytology smear preparations or formalin-fixed paraffin-embedded blocks for each case [8]. We aimed to analyze more than one tissue sample for each case, preferably selecting samples from different blocks and/or with different fixation. The characteristics of patients in relation to MGMT promoter methylation are shown in Table 1.

### MGMT promoter methylation Analysis

The QIAamp DNA Mini Kit (Qiagen) was used for genomic DNA isolation from frozen tumor tissues. Spectrophotometry was used for DNA extraction and quantification. Bisulfite modification of 1 mg DNA was performed and each bisulfite modification experiment included universal methylated DNA as positive control and normal brain DNA as negative control. Pyrosequencing was carried out by Gene Tech (Shanghai) Company Limited. The pyrosequencing assay was performed as described by J Dunn et al [2]. The primers used for amplification of bisulphite-treated DNA were forward: 5'-gGGATAGTTGGGATAGTT-3' (the first g avoids formation of hairpin loops) and reverse: 5'-biotin-ATTTGGTGAGTGTTTGGG-3' giving a 99-bp amplicon at genomic position 131 155 467–131 155 565. The PCR analysis was performed in duplicate in 25 µl reaction volume. To confirm the correct product before pyrosequencing, 3 ml of PCR products were analyzed on a 2% agarose gel, the remaining 22 ml was subjected to pyrosequencing. The Pyro Q-CpG software 1.0.9 (Biotage) was used to analyze data. Pyrosequencing yielded data for 12 CpG sites within the MGMT promoter. For the data analysis, the percentage methylation obtained for each CpG was averaged across the 12 CpGs in duplicate PCR reactions (average methylation per sample). Compared with the clinical data, the

glioblastomas were considered to be methylated if they had at least one sample with an average methylation  $\geq 10\%$  ( $\geq \text{mean} \pm 2\text{s.d.}$  for non-neoplastic brain) in more than one independent bisulfite modification [2,9–11]. The average methylation of unmethylated cases was <10% in all samples. The average methylation per case was calculated by averaging the average methylation per sample for the methylated samples for that case. Further, according to extent of methylation, the prognostic stratification was split into 4 groups: fully unmethylated(0% methylation), unmethylated(>0 to <10% methylation), methylated( $\geq 10$  to <100% methylation), fully methylated(100% methylation).

### Statistical analysis

The differences in clinicopathologic variables in different groups were evaluated by the Exact Sig (2-sided)  $\chi^2$  test. Kaplan-Meier survival curves were obtained, and differences in PFS or OS were tested for statistical significance using the log-rank test.  $P < 0.05$  was considered the statistically significance level. A stepwise Cox regression multivariate analysis for factors significantly associated with survival in the univariate analysis was performed with the parameters of a significance of 0.05 for entry and 0.01 for removal. The data were analyzed using PASW Statistics 18 (Version 18.0.0).

### Results

The patient characteristics are summarized in Table 1. 75 out of 128 patients (58.6%) had average methylation across all CpGs in at least one clinical sample greater than 10% and were classified as methylated, the average methylation in methylated cases was  $44.4 \pm 23.4\%$ , and 100% methylation (fully methylated) was detected in 3 patients (3/75, 4.0%). And the other 53 patients (41.4%) was classified as unmethylated, the average methylation in unmethylated cases was  $2.1 \pm 1.6\%$ , and 0% methylation (fully unmethylated) were detected in 19 patients (19/53, 35.8%). No significant correlation was observed between the MGMT promoter methylation status and any baseline variables, including age at study entry ( $p = 0.444$ ), gender ( $p = 0.398$ ), KPS ( $p = 0.446$ ), and surgery ( $p = 0.662$ ). Furthermore, Kaplan–Meier analysis and

**Table 1.** Summary of glioblastoma patient characteristics.

| Characteristics    | MGMT promoter methylation<br>(N = 128)(%) |                          | P values                    |
|--------------------|-------------------------------------------|--------------------------|-----------------------------|
|                    | Methylated<br>(N = 75)                    | Unmethylated<br>(N = 53) |                             |
| <b>Age</b>         |                                           |                          | $\chi^2 = 0.586, p = 0.444$ |
| <50                | 29(38.7)                                  | 17(32.1)                 |                             |
| ≥ 50               | 46(61.3)                                  | 36(67.9)                 |                             |
| <b>Gender</b>      |                                           |                          | $\chi^2 = 0.714, p = 0.398$ |
| Male               | 42(56.0)                                  | 37(69.8)                 |                             |
| Female             | 33(44.0)                                  | 16(30.2)                 |                             |
| <b>KPS</b>         |                                           |                          | $\chi^2 = 0.586, p = 0.446$ |
| <80                | 44(58.7)                                  | 35(66.0)                 |                             |
| ≥ 80               | 31(41.3)                                  | 18(34.0)                 |                             |
| <b>Surgery</b>     |                                           |                          | $\chi^2 = 0.191, p = 0.662$ |
| total resection    | 20(26.7)                                  | 16(30.2)                 |                             |
| subtotal resection | 55(73.3)                                  | 37(69.8)                 |                             |

doi:10.1371/journal.pone.0107558.t001



**Table 3.** Extent of MGMT promoter methylation and clinical outcome in Chinese glioblastoma patients\*.

|                                             | NO. | PFS             |           | OS              |           |
|---------------------------------------------|-----|-----------------|-----------|-----------------|-----------|
|                                             |     | Median (months) | 95% CI    | Median (months) | 95% CI    |
| Fully unmethylated(0% methylation)          | 19  | 4.1             | 3.8–4.4   | 6.4             | 5.3–7.5   |
| Unmethylated(>0 to <10% methylation)        | 34  | 7.8             | 7.3–8.3   | 10.3            | 8.8–11.8  |
| Methylated( $\geq$ 10 to <100% methylation) | 72  | 8.1             | 7.8–8.4   | 12.6            | 12.1–13.5 |
| Fully methylated(100% methylation)          | 3   | 51.0            | 30.2–72.5 | 59.0            | 44.1–77.2 |

\*For PFS: LOG RANK  $\chi^2 = 82.134$ ,  $p < 0.001$ ; For OS:  $\chi^2 = 23.145$ ,  $p < 0.001$ .  
doi:10.1371/journal.pone.0107558.t003

tions [2,11]. Our results showed that GBM patients with MGMT promoter methylation had a better outcome with regard to overall survival at a statistically significant level.

MGMT plays an important role in maintaining genomic integrity by removing alkyl adducts from the O<sup>6</sup> position of deoxy-guanine and preventing the formation of DNA interstrand cross-links and is believed to be the most important factor in the acquisition of clinical resistance to alkylating agents [7,21–22].

The limitation of this study is that the analysis of MGMT protein expression was not performed. In theory, the effect of MGMT promoter methylation on prognosis and chemosensitivity to alkylating agents depends on the expression of the MGMT protein. Therefore, MGMT expression at the protein level may also have similar efficacy for predicting prognosis and chemosensitivity in GBM patients [7,11,19]. But the relationship between methylation and protein expression was still questioned [2,19].

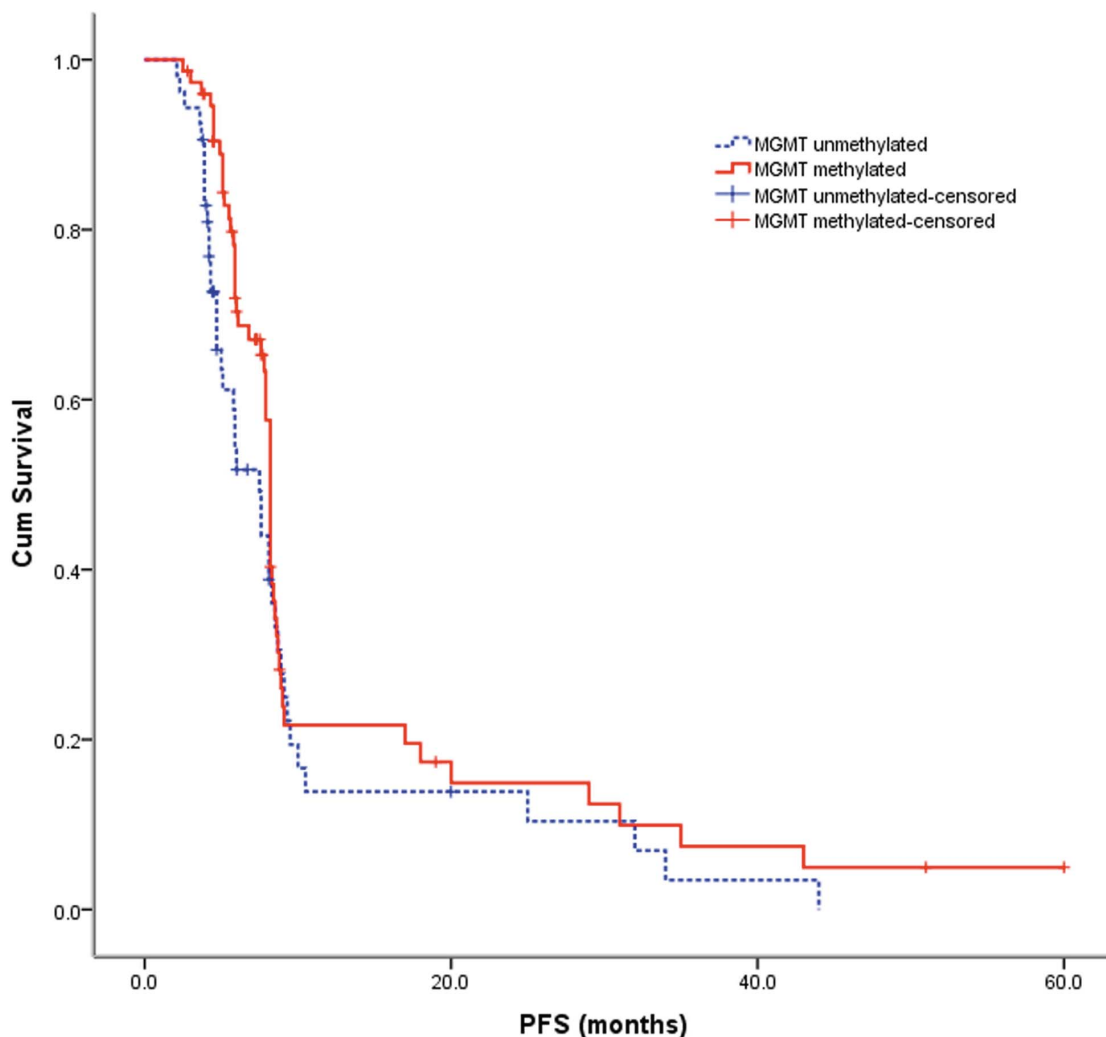

**Figure 1.** PFS after treatment in patients with methylated and unmethylated MGMT promoter glioblastomas (log-rank  $P = 0.112$ ).  
doi:10.1371/journal.pone.0107558.g001

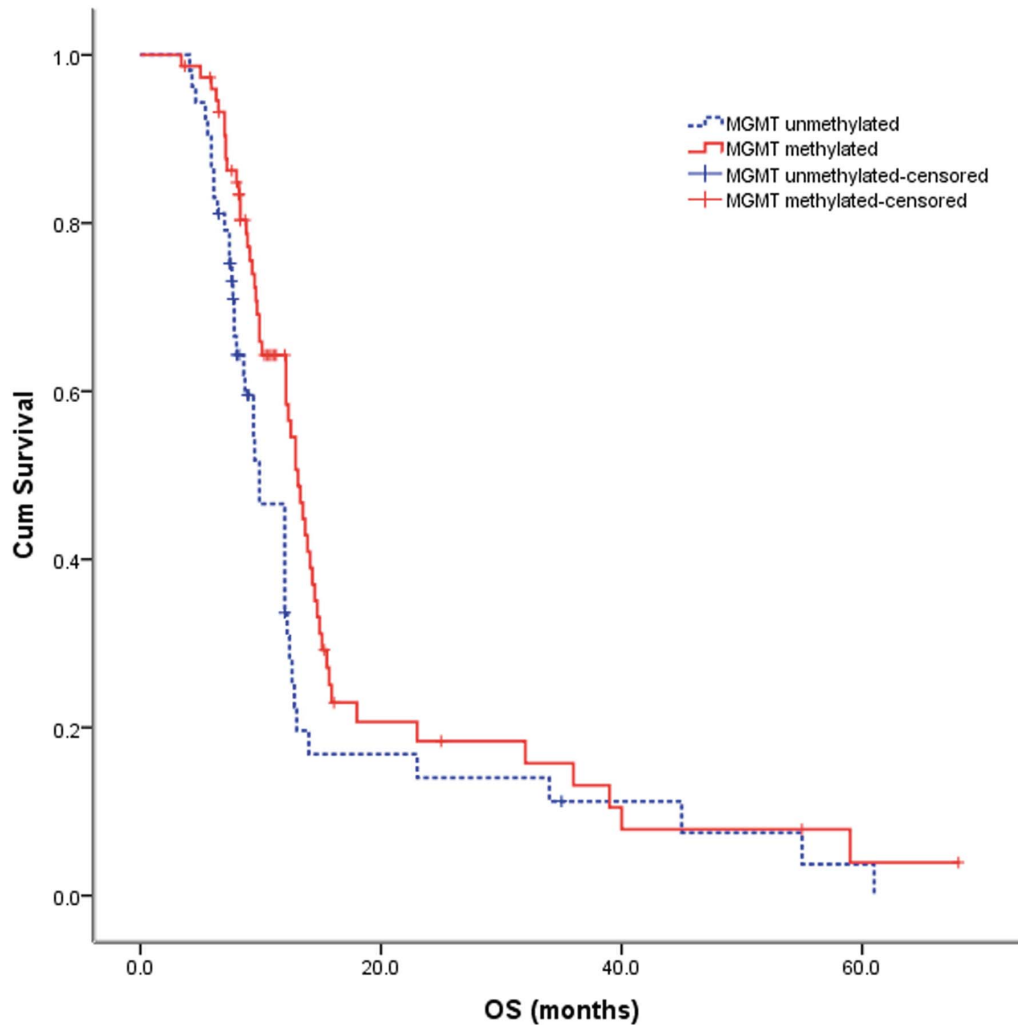

**Figure 2. OS after treatment in patients with methylated and unmethylated MGMT promoter glioblastomas (log-rank  $P = 0.029$ ).**  
doi:10.1371/journal.pone.0107558.g002

This study also found that the MGMT promoter methylation status shows certain differences when sampling from different parts of tumors. The reason may be related to the presence of pathological heterogeneity and genetic inhomogeneity in different parts of glioblastoma tissues and clinical factors [23–25]. Similar results were also reported for malignant melanoma [25–27].

Currently, there are few reliable clinical indicators and testing methods for guiding chemotherapy [28,29]. Random sampling from tissues is used to detect the MGMT gene promoter methylation status to predict whether cancer patients are resistant to alkylating agents [30,31]. Because tumor heterogeneity exists, such a strategy will inevitably result in false negatives [17,26,32]. Therefore, it is necessary to explore detection methods using sampling from multiple sites of the tumor to derive the MGMT gene promoter methylation status to study the corresponding sequential chemotherapy dosage and mode of administration.

## References

- Fabi A, Russillo M, Metro G, Vidiri A, Di Giovanni S, et al. (2009) Pseudoprogression and MGMT status in glioblastoma patients: implications in clinical practice. *Anticancer Research* 29: 2607–2610.
- Dunn J, Baboric A, Alam F, Joyce K, Moxham M, et al. (2009) Extent of MGMT promoter methylation correlates with outcome in glioblastomas given temozolomide and radiotherapy. *British Journal of Cancer* 101: 124–131.
- Hegi ME, Diserens A-C, Gorlia T, Hamou M-F, de Tribolet N, et al. (2005) MGMT gene silencing and benefit from temozolomide in glioblastoma. *The New England Journal Of Medicine* 352: 997–1003.
- Donson AM, Addo-Yobo SO, Handler MH, Gore L, Foreman NK (2007) MGMT promoter methylation correlates with survival benefit and sensitivity to temozolomide in pediatric glioblastoma. *Pediatric Blood & Cancer* 48: 403–407.

## Supporting Information

**Data S1**  
(SAV)

## Acknowledgments

The authors would like to thank those participating in the data collection and laboratory work.

## Author Contributions

Conceived and designed the experiments: DS WDM. Performed the experiments: DS TL QFL XDL QW FL. Analyzed the data: DS TL. Contributed reagents/materials/analysis tools: QW FL. Contributed to the writing of the manuscript: DS TL WDM.

5. Motomura K, Natsume A, Kishida Y, Higashi H, Kondo Y, et al. (2011) Benefits of interferon- $\beta$  and temozolomide combination therapy for newly diagnosed primary glioblastoma with the unmethylated MGMT promoter: A multicenter study. *Cancer* 117: 1721–1730.
6. Kitange GJ, Mladek AC, Carlson BL, Schroeder MA, Pokorny JL, et al. (2012) Inhibition of histone deacetylation potentiates the evolution of acquired temozolomide resistance linked to MGMT upregulation in glioblastoma xenografts. *Clinical Cancer Research: An Official Journal Of The American Association For Cancer Research* 18: 4070–4079.
7. Tang K, Jin Q, Yan W, Zhang W, You G, et al. (2012) Clinical correlation of MGMT protein expression and promoter methylation in Chinese glioblastoma patients. *Medical Oncology (Northwood, London, England)* 29: 1292–1296.
8. Bady P, Sciuscio D, Diserens A-C, Bloch J, van den Bent MJ, et al. (2012) MGMT methylation analysis of glioblastoma on the Infinium methylation BeadChip identifies two distinct CpG regions associated with gene silencing and outcome, yielding a prediction model for comparisons across datasets, tumor grades, and CIMP-status. *Acta Neuropathologica* 124: 547–560.
9. Costa BM, Caeiro C, Guimarães I, Martinho O, Jaraquemada T, et al. (2010) Prognostic value of MGMT promoter methylation in glioblastoma patients treated with temozolomide-based chemoradiation: a Portuguese multicentre study. *Oncology Reports* 23: 1655–1662.
10. Drabycz S, Roldán G, de Robles P, Adler D, McIntyre JB, et al. (2010) An analysis of image texture, tumor location, and MGMT promoter methylation in glioblastoma using magnetic resonance imaging. *Neuroimage* 49: 1398–1405.
11. Uno M, Oba-Shinjo SM, Camargo AA, Moura RP, Aguiar PHd, et al. (2011) Correlation of MGMT promoter methylation status with gene and protein expression levels in glioblastoma. *Clinics (São Paulo, Brazil)* 66: 1747–1755.
12. Christmann M, Nagel G, Horn S, Krahn U, Wiewrodt D, et al. (2010) MGMT activity, promoter methylation and immunohistochemistry of pretreatment and recurrent malignant gliomas: a comparative study on astrocytoma and glioblastoma. *International Journal Of Cancer Journal International Du Cancer* 127: 2106–2118.
13. Kim YS, Kim SH, Cho J, Kim JW, Chang JH, et al. (2012) MGMT gene promoter methylation as a potent prognostic factor in glioblastoma treated with temozolomide-based chemoradiotherapy: a single-institution study. *International Journal Of Radiation Oncology, Biology, Physics* 84: 661–667.
14. Chul-Kee P, Sung-Hye P, Se-Hoon L, Chae-Yong K, Dong-Wan K, et al. (2009) Methylation status of the MGMT gene promoter fails to predict the clinical outcome of glioblastoma patients treated with ACNU plus cisplatin. *Neuropathology* 29: 443–449.
15. SteelFisher GK, Blendon RJ, Bekheit MM, Mitchell EW, Williams J, et al. (2011) Novel pandemic A (H1N1) influenza vaccination among pregnant women: motivators and barriers. *American Journal of Obstetrics and Gynecology* 204: S116–S123.
16. Gerstner ER, Yip S, Wang DL, Louis DN, Iafrate AJ, et al. (2009) Mgmt methylation is a prognostic biomarker in elderly patients with newly diagnosed glioblastoma. *Neurology* 73: 1509–1510.
17. Kitange GJ, Carlson BL, Mladek AC, Decker PA, Schroeder MA, et al. (2009) Evaluation of MGMT promoter methylation status and correlation with temozolomide response in orthotopic glioblastoma xenograft model. *Journal Of Neuro-Oncology* 92: 23–31.
18. Reifenberger G, Hentschel B, Felsberg J, Schackert G, Simon M, et al. (2012) Predictive impact of MGMT promoter methylation in glioblastoma of the elderly. *International Journal Of Cancer Journal International Du Cancer* 131: 1342–1350.
19. Sasai K, Nodagashira M, Nishihara H, Aoyanagi E, Wang L, et al. (2008) Careful exclusion of non-neoplastic brain components is required for an appropriate evaluation of O<sup>6</sup>-methylguanine-DNA methyltransferase status in glioma: relationship between immunohistochemistry and methylation analysis. *Am J Surg Pathol* 32: 1220–1227.
20. Park C-K, Park S-H, Lee S-H, Kim C-Y, Kim D-W, et al. (2009) Methylation status of the MGMT gene promoter fails to predict the clinical outcome of glioblastoma patients treated with ACNU plus cisplatin. *Neuropathology: Official Journal Of The Japanese Society Of Neuropathology* 29: 443–449.
21. Lechapt-Zalcman E, Levallet G, Dugué AE, Vital A, Diebold M-D, et al. (2012) O(6)-methylguanine-DNA methyltransferase (MGMT) promoter methylation and low MGMT-encoded protein expression as prognostic markers in glioblastoma patients treated with biodegradable carmustine wafer implants after initial surgery followed by radiotherapy with concomitant and adjuvant temozolomide. *Cancer* 118: 4545–4554.
22. Romano A, Calabria L, Tavanti F, Minniti G, Rossi-Espagnet M, et al. (2013) Apparent diffusion coefficient obtained by magnetic resonance imaging as a prognostic marker in glioblastomas: correlation with MGMT promoter methylation status. *European Radiology* 23: 513–520.
23. Nehru GA, Pai R, Samuel P, Chacko AG, Chacko G (2012) Status of O<sup>6</sup>-methylguanine-DNA methyltransferase [MGMT] gene promoter methylation among patients with glioblastomas from India. *Neurology India* 60: 481–486.
24. Della Puppa A, Persano L, Masi G, Rampazzo E, Sinigaglia A, et al. (2012) MGMT expression and promoter methylation status may depend on the site of surgical sample collection within glioblastoma: a possible pitfall in stratification of patients? *Journal Of Neuro-Oncology* 106: 33–41.
25. Carrillo JA, Lai A, Nghiempfu PL, Kim HJ, Phillips HS, et al. (2012) Relationship between tumor enhancement, edema, IDH1 mutational status, MGMT promoter methylation, and survival in glioblastoma. *AJNR American Journal Of Neuroradiology* 33: 1349–1355.
26. Ellington SR, Hartman LK, Acosta M, Martinez-Romo M, Rubinson L, et al. (2011) Pandemic 2009 influenza A (H1N1) in 71 critically ill pregnant women in California. *American Journal of Obstetrics and Gynecology* 204: S21–S30.
27. Berghoff AS, Preusser M (2012) Clinical neuropathology practice guide 06-2012: MGMT testing in elderly glioblastoma patients—yes, but how? *Clinical Neuropathology* 31: 405–408.
28. Thon N, Eigenbrod S, Grasbon-Frodl EM, Lutz J, Kreth S, et al. (2011) Predominant influence of MGMT methylation in non-resectable glioblastoma after radiotherapy plus temozolomide. *Journal Of Neurology, Neurosurgery, And Psychiatry* 82: 441–446.
29. Christians A, Hartmann C, Benner A, Meyer J, Deimling Av, et al. (2012) Prognostic Value of Three Different Methods of MGMT Promoter Methylation Analysis in a Prospective Trial on Newly Diagnosed Glioblastoma. *PLoS ONE* 7: 1–9.
30. Niklas T (2011) Predominant influence of MGMT methylation in non-resectable glioblastoma after radiotherapy plus temozolomide. *Journal of Neurology, Neurosurgery & Psychiatry* 82: 441–446.
31. Malley DS, Hamoudi RA, Kocalkowski S, Pearson DM, Collins VP, et al. (2011) A distinct region of the MGMT CpG island critical for transcriptional regulation is preferentially methylated in glioblastoma cells and xenografts. *Acta Neuropathologica* 121: 651–661.
32. Hau P, Stupp R, Hegi ME (2007) MGMT methylation status: the advent of stratified therapy in glioblastoma? *Disease Markers* 23: 97–104.
